# Supplementary material for: Digital version of the European Atlas of natural radiation
Source: PubMed Central journal article supplement — J Environ Radioact. 2019 Jan;196:240–52. doi: 10.1016/j.jenvrad.2018.02.008 (PMC6290173; doi:10.1016/j.jenvrad.2018.02.008), 2019-01

## Quantile-quantile plots of U, Th and K2O FOREGS Topsoil database considering normal and log-normal distribution

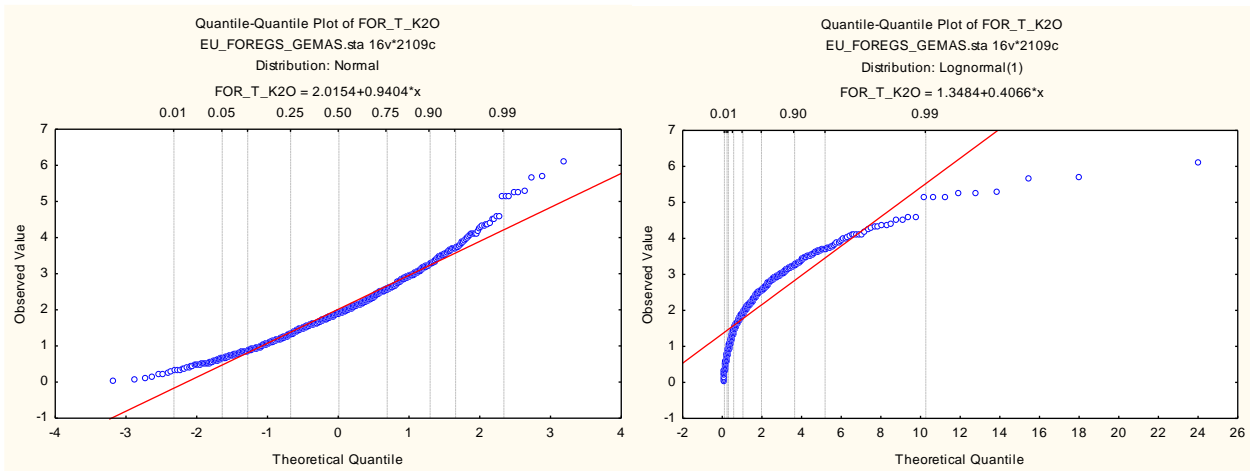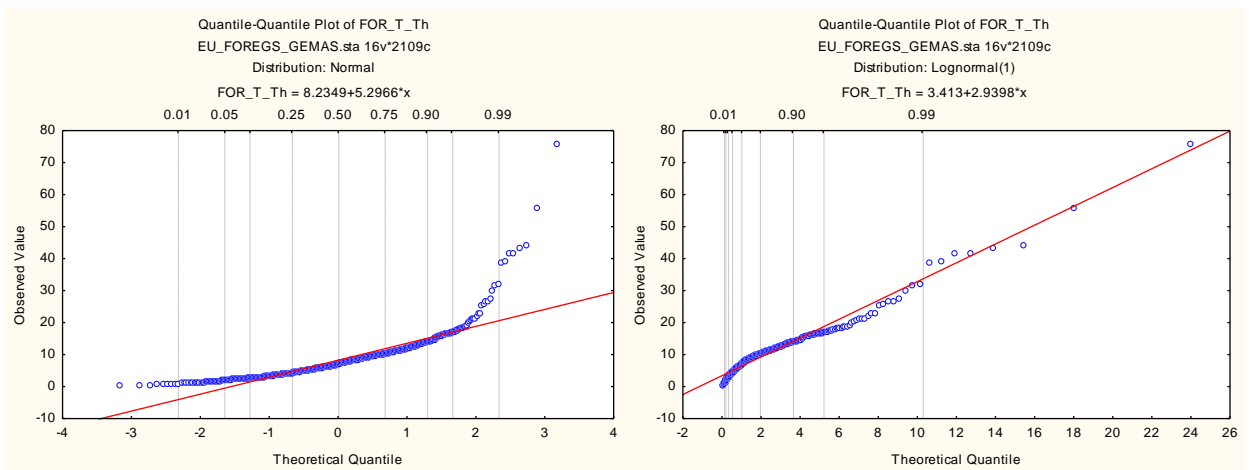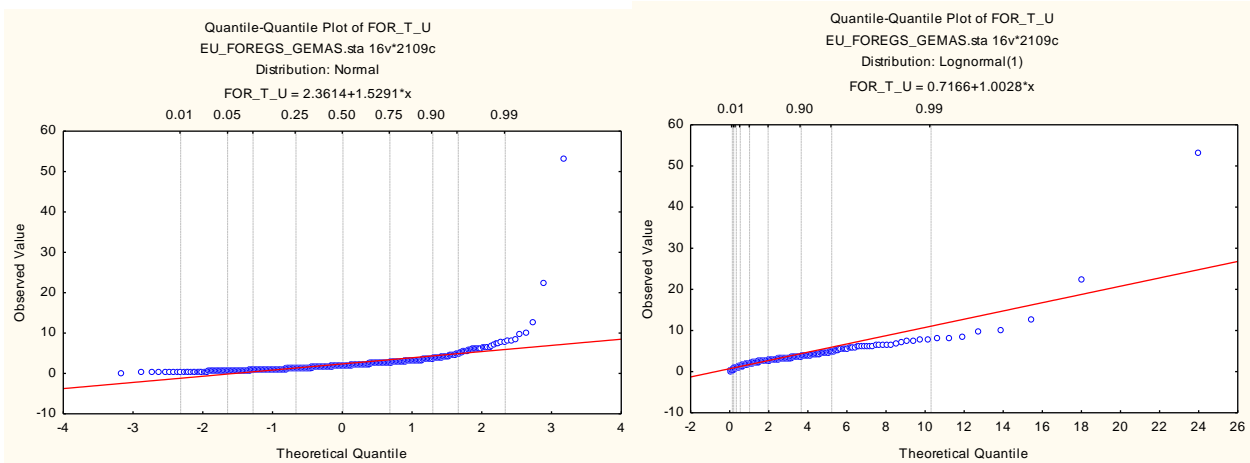

## Quantile-quantile plot of U, Th and K2O GEMAS (Ap+Gr) database

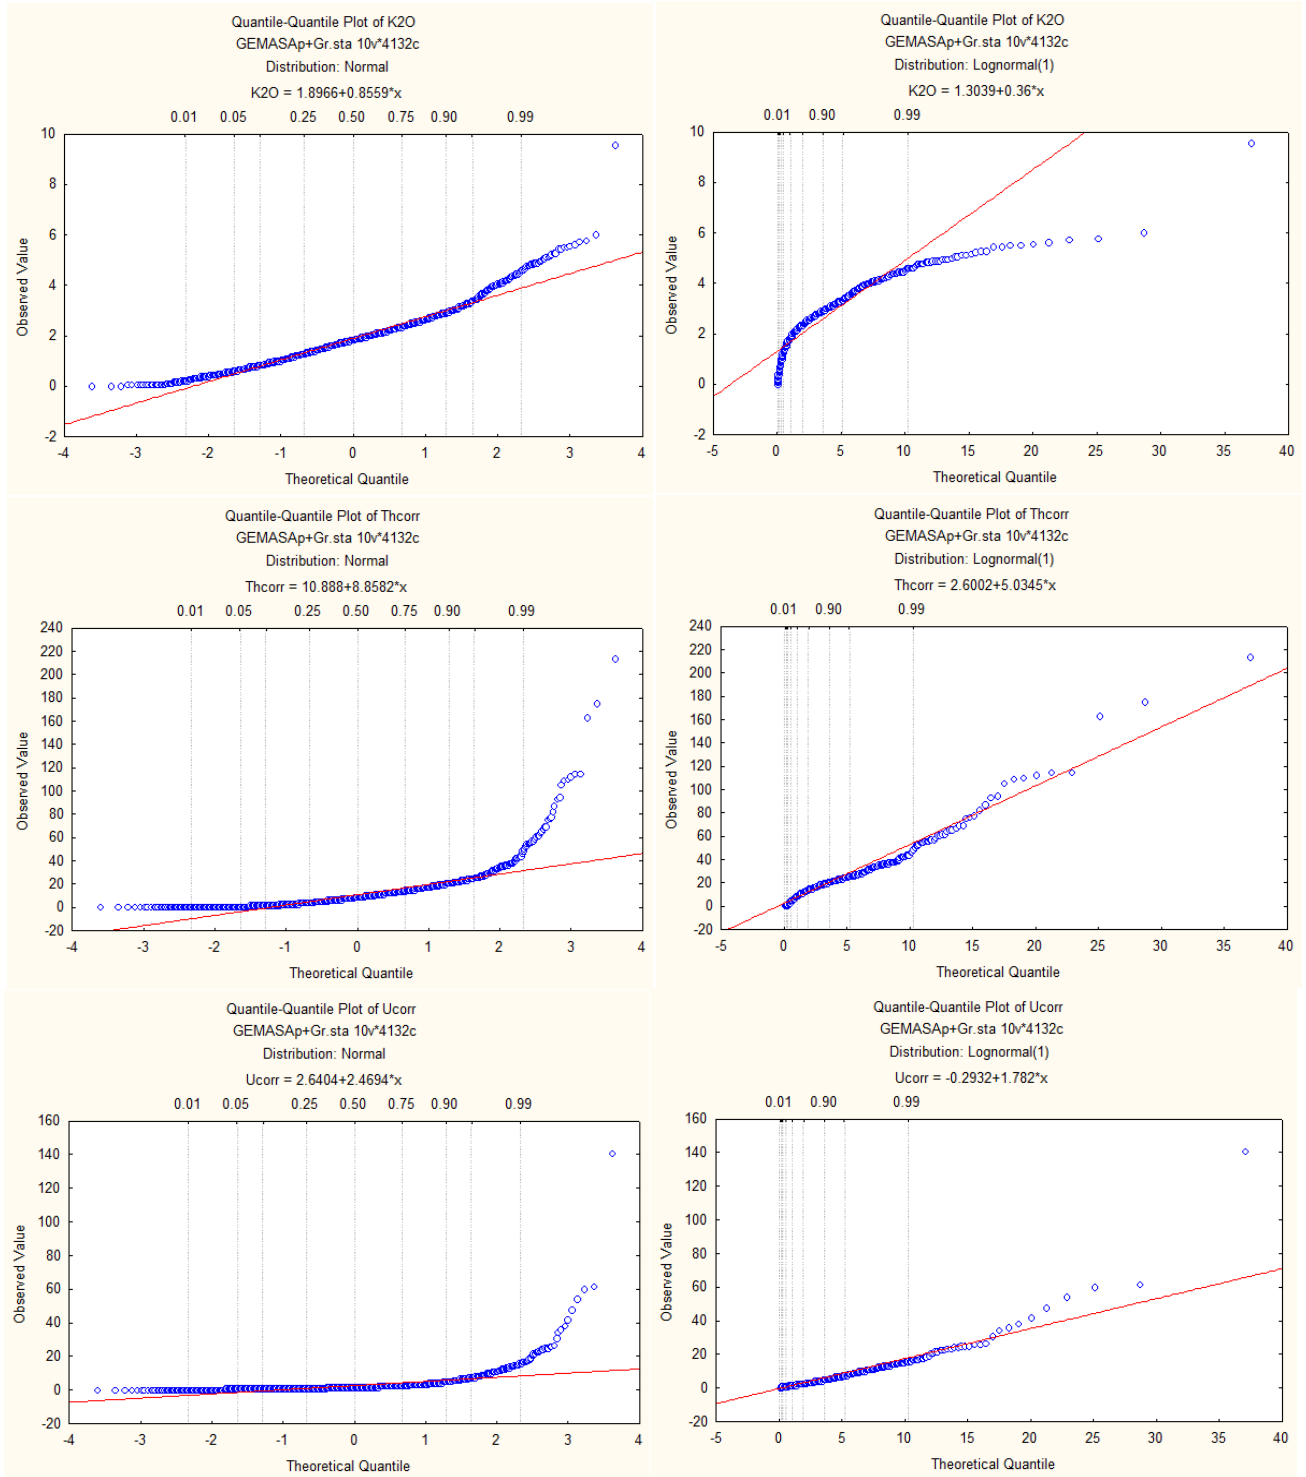

Supplement: mmc2.pdf [file mmc2.pdf]
